# Supplementary material
Source: PubMed Central journal article supplement (PMC9492351)

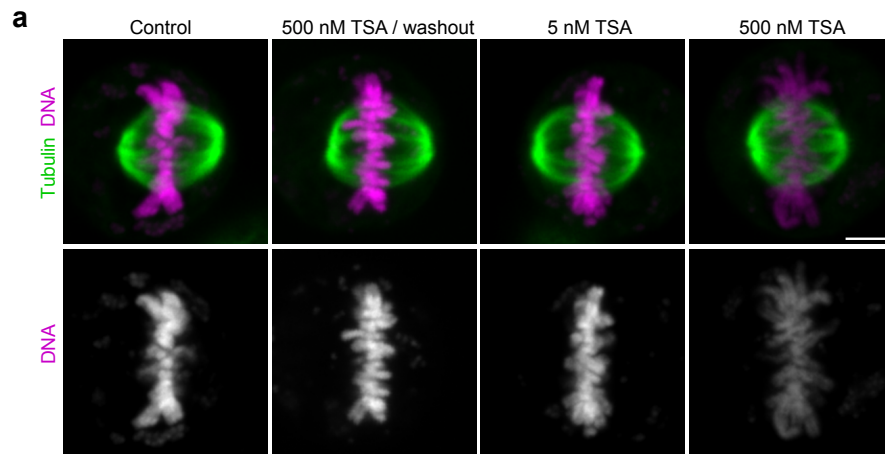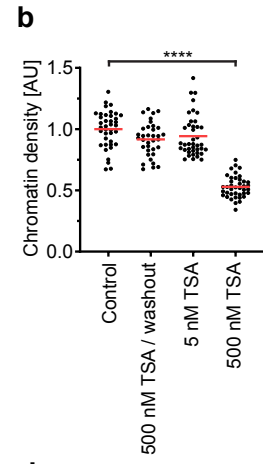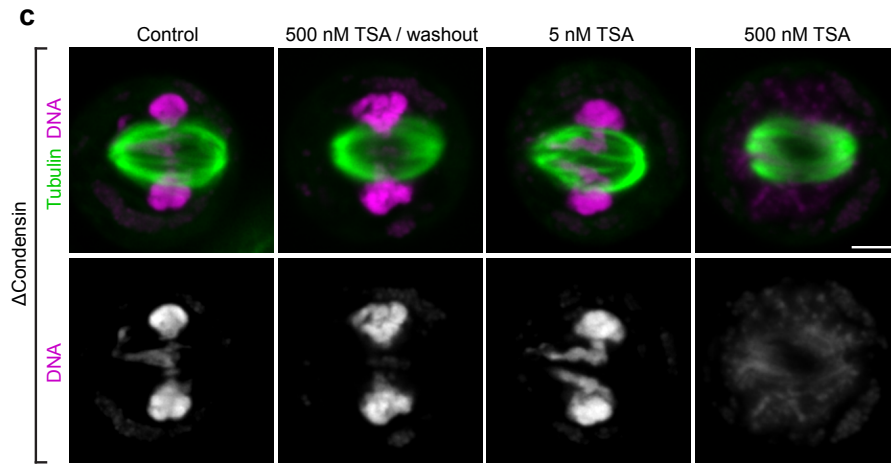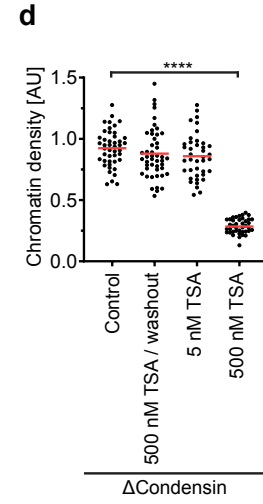

Supplement: EMS153637-supplement-Extended_Data_Fig__4.pdf [file EMS153637-supplement-Extended_Data_Fig__4.pdf]
